# Supplementary material
Source: MDPI journal article supplement (https://www.mdpi.com/2221-3759/11/4/44)
Supplement: s1 [file s1]

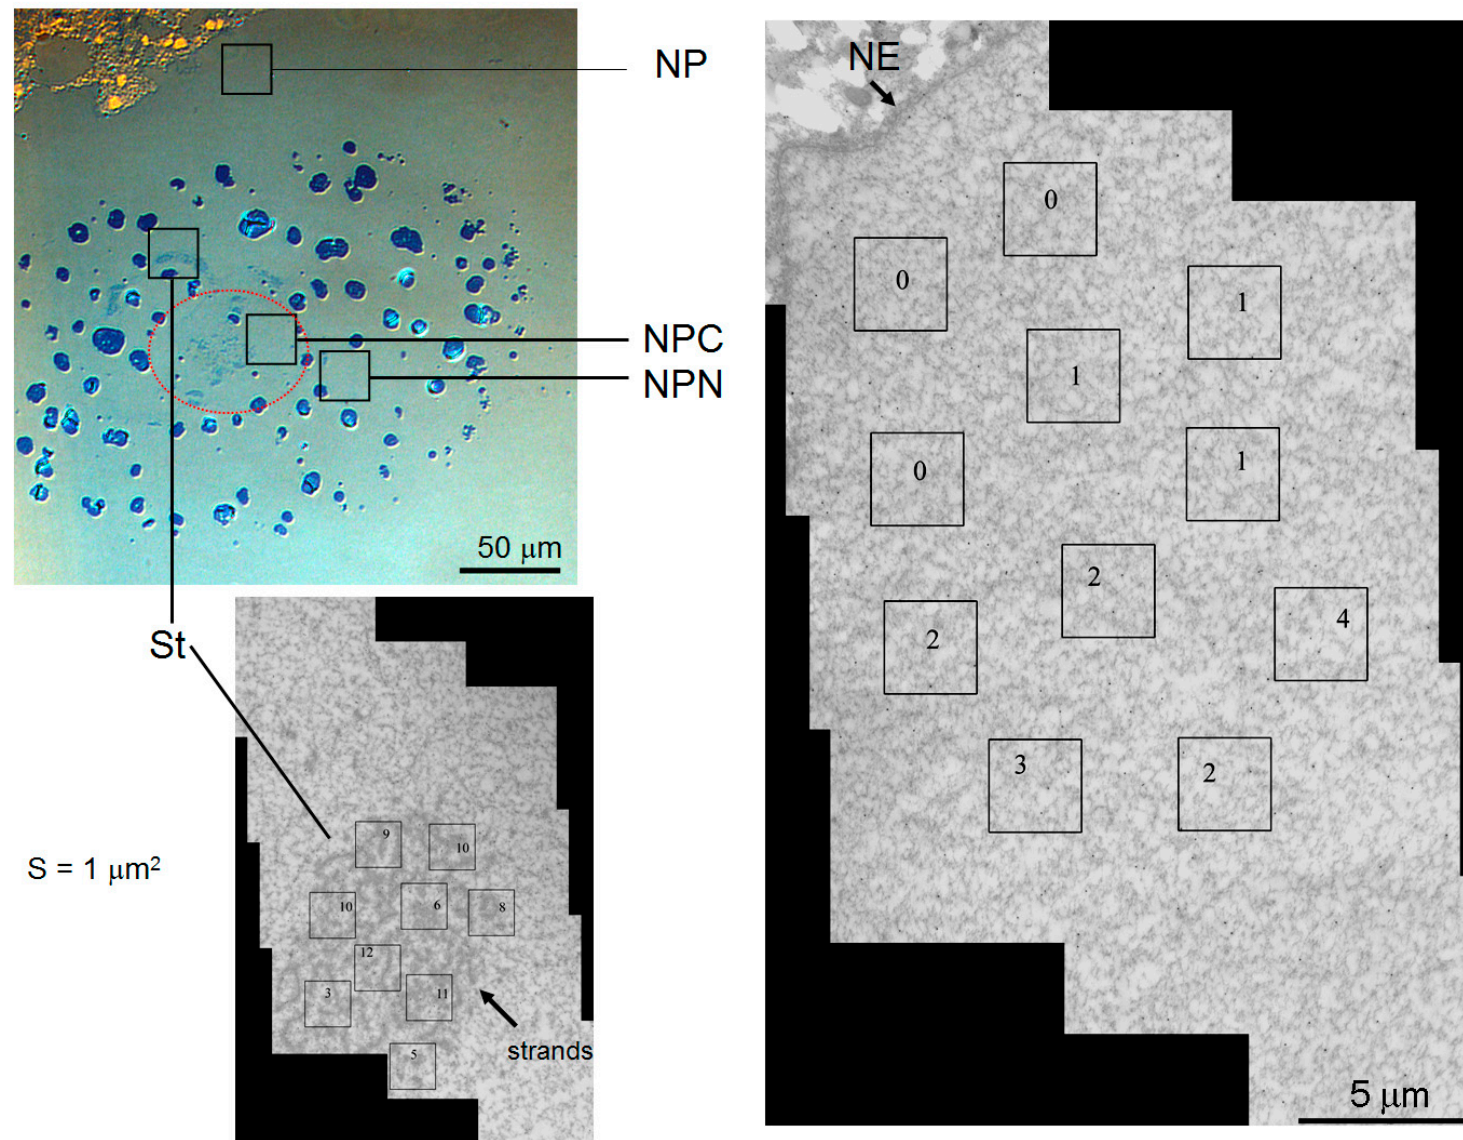

**Figure 1S.** Example of label counting procedure after immunogold labeling. The counting was performed in ultrathin sections in randomly selected squares of  $1 \mu\text{m}^2$ . The numbers indicate the number of labels in the square. The compared areas of the germinal vesicle are the following: NP, peripheral regions of the nucleoplasm, i.e., located far from the nucleolar assemblage containing the karyosphere; NPN, nucleoplasm in the region of the nucleolar assemblage, but away from the chromosomes; NPC, nucleoplasm in the karyosphere region (red circle in the semithin section); St, areas of the extrachromosomal strands. NE, nuclear envelope.
