# Supplementary material
Source: MDPI journal article supplement (https://www.mdpi.com/2221-3759/11/4/44)
Supplement: s1 [file s1]

**Table S1.** Number of animals and oocytes used in experiments.

| Method                           | Number of Animals                                 |                                                        | Number of oocytes                               |
|----------------------------------|---------------------------------------------------|--------------------------------------------------------|-------------------------------------------------|
|                                  | "Spring" frogs during the natural breeding season | "Autumn" and "winter" frogs after hormonal stimulation |                                                 |
| DAPI staining of unfixed GVs     | 5                                                 | 6                                                      | at least 10 from each animal                    |
| Proteomic analysis               | 3                                                 | –                                                      | at least 30 from each animal                    |
| Immunofluorescence microscopy    | 5                                                 | 6                                                      | at least 5 to identify each protein of interest |
| Conventional electron microscopy | 3                                                 | –                                                      | at least 5                                      |
| Immunoelectron microscopy        | 3                                                 | 1                                                      | at least 5                                      |
| Immunoblot analysis              | 3                                                 | –                                                      | at least 30 from each animal                    |
